# Supplementary material
Source: MDPI journal article supplement (https://www.mdpi.com/2076-3417/10/19/6721)
Supplement: s1 [file s1]

# Antibacterial Effects of MicroRepair®BIOMA-Based Toothpaste and Chewing Gum on Orthodontic Elastics Contaminated In Vitro with Saliva from Healthy Donors: A Pilot Study

Aida Meto <sup>1</sup>, Bruna Colombari <sup>2</sup>, Alessandra Odorici <sup>1</sup>, Lavinia Beatrice Giva <sup>3</sup>, Eva Pericolini <sup>2</sup>, Annunziata La Regina <sup>4</sup> and Elisabetta Blasi <sup>2,\*</sup>

<sup>1</sup> School of Doctorate in Clinical and Experimental Medicine, Laboratory of Microbiology and Virology, University of Modena and Reggio Emilia, Via G. Campi 287, 41125 Modena, Italy; aidameto@yahoo.com (A.M.); odorici.alessandra@gmail.com (A.O.)

<sup>2</sup> Department of Surgery, Medicine, Dentistry and Morphological Sciences with interest in Transplant, Oncology and Regenerative Medicine, Laboratory of Microbiology and Virology, University of Modena and Reggio Emilia, Via G. Campi 287, 41125 Modena, Italy; bruna.colombari@unimore.it (B.C.); eva.pericolini@unimore.it (E.P.)

<sup>3</sup> School of Specialization in Microbiology and Virology, University of Modena and Reggio Emilia, Via G. Campi 287, 41125 Modena, Italy; lavinia.giva@gmail.com

<sup>4</sup> Laboratories of Clinical Microbiology, AOU-Policlinic of Modena, 41125 Modena, Italy; laregina.annunziata@aou.mo.it

\* Correspondence: elisabetta.blasi@unimore.it; Tel.: +39-0592055468

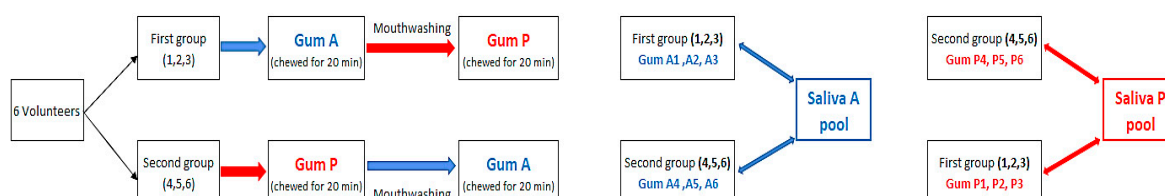

**Figure 1.** Flow-chart of the saliva collection.
